# Supplementary material
Source: PubMed Central journal article supplement (PMC8167697)
Supplement: ajcr0011-2303-f9.pdf [file ajcr0011-2303-f9.pdf]

## Mitochondrial structure and platinum resistance in ovarian cancer

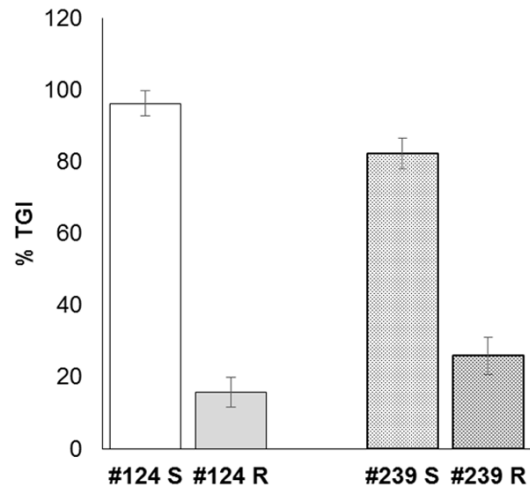

**Supplementary Figure 1.** Mean  $\pm$  SE of the percentage of tumor growth inhibition after DDP treatment in S and R models of #124 and #239 PDXs. %TGI was calculated as:  $[100 - (\text{median weight of treated tumors} / \text{median weight of control tumors}) \times 100]$ .
